# Supplementary material
Source: PubMed Central journal article supplement (PMC3209787)

**SUPPLEMENTAL INFORMATION**

**Dual Role of FoxA1 in Androgen Receptor Binding to Chromatin, Androgen Signaling and Prostate Cancer**

Biswajyoti Sahu<sup>1</sup>, Marko Laakso<sup>1,2</sup>, Kristian Ovaska<sup>1,2</sup>, Tuomas Mirtti<sup>3,4</sup>, Johan Lundin<sup>4</sup>, Antti Rannikko<sup>5</sup>, Anna Sankila<sup>3</sup>, Juha-Pekka Turunen<sup>3</sup>, Mikael Lundin<sup>4</sup>, Juho Konsti<sup>4</sup>, Tiina Vesterinen<sup>4</sup>, Stig Nordling<sup>3</sup>, Olli Kallioniemi<sup>4</sup>, Sampsa Hautaniemi<sup>1,2</sup>, and Olli A. Jänne<sup>1,6</sup>

<sup>1</sup>Institute of Biomedicine and <sup>2</sup>Research Programs Unit, Genome-Scale Biology, Biomedicum Helsinki, University of Helsinki, FI-00014 Helsinki, Finland, <sup>3</sup>Department of Pathology, Haartman Institute, University of Helsinki and HUSLAB, Helsinki University Central Hospital, FI-00014 Helsinki, Finland, <sup>4</sup>Institute for Molecular Medicine, University of Helsinki, FI-00014 Helsinki, Finland, <sup>5</sup>Department of Urology, Helsinki University Central Hospital, FI-00290 Helsinki, Finland, and <sup>6</sup>Department of Clinical Chemistry, Helsinki University Central Hospital, FI-00290 Helsinki, Finland

## Supplementary Figure Legends

**Figure S1.** Loading of AR to *PSA* and *TMPRSS2* enhancers in parental and FoxA1-depleted LNCaP-1F5 cells in response to a 2-h exposure to different concentrations of 5 $\alpha$ -dihydrotestosterone (DHT). Each point represents the mean value of two independent experiments.

**Figure S2.** Distribution of the distance between AR- and FoxA1-binding peaks in parental cells (A) and in the subgroup of ARBs pioneered by FoxA1 (B). The median distances were 43 and 41 nt (red line) in parental cell and FoxA1-pioneered ARBs, respectively.

**Figure S3.** Examples of the co-occupancy between AR- and FoxA1-binding sites around AR target genes. The number of reads for AR binding (left, in blue) and FoxA1 binding (right, in purple) is shown on the y-axes. Below each plot, there is a schematic description of the transcription unit in question, with the transcription start site and the direction of transcription being denoted by arrows, exons by black solid bars and introns by horizontal lines, respectively.

**Figure S4.** (A) LNCaP-1F5 cells were treated for 72 h with siRNA specific for FoxA1 mRNA (siFoxA1) or control siRNA (parental), after which total RNA samples were subjected to qPCR using primers specific for FoxA1 mRNA. 5 $\alpha$ -Dihydrotestosterone (DHT) exposure time was 2 h. GAPDH mRNA was used for data normalization. (B) Total AR levels in parental and FoxA1-depleted LNCaP-1F5 and VCaP cells after a 2-h exposure to DHT. Immunoblotting was performed with anti-AR (Kang *et al*, 2004) and GAPDH (sc-47724, Santa Cruz) antibodies.

**Figure S5.** Directed ChIP validation of ARBs in the three different categories defined by FoxA1. The ChIP-qPCR assays were performed in parental (white bars) and siFoxA1 (black bars) cells after a 2-h exposure to 100 nM DHT (+) or vehicle (-). Mean + S.E.M. values are shown for duplicate samples. Primer pairs used for the selected sites are given in Supplementary Table S13.

**Figure S6.** Directed ChIP validation of FoxA1-independent and FoxA1-pioneered ARBs in parental (white bars) and FoxA1-depleted (black bars) VCaP cells. The cells were exposed for 2 h to 100 nM DHT (+) or vehicle (-). Mean + S.E.M. values are shown for duplicate samples. Primer pairs used for the selected sites are given in Supplementary Table S13.

**Figure S7.** Temporal and DHT dose-dependent accumulation of androgen-regulated mRNAs in the three classes defined by FoxA1. For each group, two mRNAs were selected as examples, and their accumulation was followed after exposure to 100 nM DHT for 8, 16, and 24 h in parental (yellow bars) or siFoxA1 (red bars) cells (upper panels). Accumulation of the same mRNAs in response to 0–100 nM DHT was determined at 24 h (lower panel). (A) FoxA1-independent genes; (B) FoxA1-pioneered genes, and (C) new genes in siFoxA1 cells. Mean + S.E.M. values are shown for three biological replicate experiments. Transcript levels were determined by qPCR using the primers listed Supplemental information, Table S11.

**Figure S8.** Examples of AR target gene expression in parental and siFoxA1 cells after a 24-h exposure to 100 nM DHT for the three classes of genes defined by FoxA1. Transcript

levels were determined by qPCR using the primers listed Supplemental information, Table S11. The results are shown as relative mRNA levels (left panels) and as fold changes (right panels). (A) Androgen regulation of genes that were independent of FoxA1. (B) Androgen regulation of genes that required the presence of FoxA1. (C) Examples of genes that became androgen-responsive in siFoxA1 cells. Mean  $\pm$  SEM values are shown for three biological replicates.

**Figure S9.** AR- and FoxA1-binding sites together with H3K4me2 marks shown as raw tag counts from ChIP-seq in both parental and siFoxA1 cells for the *kallikrein* cluster located on human chromosome 19.

**Figure S10.** (A) Disease-specific survival of prostate cancer patients according to the intensity of AR staining in the primary tumor.  $\chi^2 = 4.78$ ,  $P = 0.03$  (log-rank test). (B) Expression of FoxA1 mRNA in normal prostate tissue and in prostate adenocarcinoma specimens. The data are adapted from Kilpinen *et al*, 2008.

**Supplementary Tables S1, S6–S11**

**Table S1.** List of the top *cis*-elements enriched in the AR cistrome of the parental LNCaP-1F5 cells.

| <b>Motif</b> | <b>Enrichment Ratio</b> | <b>p-value</b> |
|--------------|-------------------------|----------------|
| AR           | 9.2338                  | 1.80E-72       |
| FoxA1        | 2.6169                  | 5.06E-244      |
| FoxA2        | 2.4796                  | 2.53E-237      |
| FoxF2        | 2.4091                  | 3.40E-62       |
| E2F1         | 2.1628                  | 4.60E-05       |
| Tal1/GATA1   | 2.0978                  | 8.90E-10       |
| STAT1        | 2.0541                  | 6.73E-07       |
| STAT3        | 1.7763                  | 3.72E-24       |
| GABPA        | 1.7693                  | 4.08E-11       |
| FoxD1        | 1.715                   | 2.81E-203      |

**Table S6.** Pathway enrichment analysis in LNCaP-1F5 cells

Pathway analysis was performed for enriched gene sets in parental and FoxA1-depleted cells using WebGestalt (<http://bioinfo.vanderbilt.edu/webgestalt/>). For the enriched gene sets, ratio of enrichment (R) and p-value from hypergeometric test was calculated and p-value adjusted by multiple test adjustment (adjP). Enriched gene sets with an adjP <0.002 are included in the table.

| Pathway                                 | Genes | Enrichment Ratio | adjP     | Regulation* |
|-----------------------------------------|-------|------------------|----------|-------------|
| <u>FoxA1-independent</u>                |       |                  |          |             |
| Metabolic pathways                      | 13    | 5.18             | 2.94e-05 | Up          |
| Biosynthesis of unsaturated fatty acids | 3     | 60.03            | 0.0004   | Up          |
| Prostate cancer                         | 4     | 14.84            | 0.005    | Up          |
| Synaptic transmission                   | 2     | 34.88            | 0.009    | Down        |
| <u>FoxA1-pioneered</u>                  |       |                  |          |             |
| Metabolic pathways                      | 20    | 5.66             | 1.53e-08 | Up          |
| Insulin signaling                       | 7     | 13.68            | 1.56e-05 | Up          |
| Adipocytokine signaling pathway         | 3     | 14               | 0.001    | Up          |
| Metabolism of lipids and lipoproteins   | 7     | 8.86             | 0.001    | Up          |
| Prostaglandin synthesis and regulation  | 3     | 30.26            | 0.001    | Up          |
| Peroxisome lipid metabolism             | 3     | 39.09            | 0.004    | Up          |
| Wnt signaling pathway                   | 4     | 19.17            | 0.0006   | Down        |
| Starch and sucrose metabolism           | 3     | 30.42            | 0.0016   | Down        |
| Myometrial relaxation and contraction   | 4     | 13.52            | 0.002    | Down        |
| <u>Unique to siFoxA1 cells</u>          |       |                  |          |             |
| IFN-gamma pathway                       | 14    | 10.49            | 1.65e-08 | Up          |
| Pathways in cancer                      | 12    | 9.31             | 5.85e-07 | Up          |
| Metabolic pathways                      | 19    | 4.41             | 5.51e-06 | Up          |
| Focal adhesion                          | 9     | 11.47            | 7.77e-06 | Up          |
| Regulation of SMAD2/3 signaling         | 11    | 10.63            | 1.54e-06 | Up          |
| TGFBR signaling                         | 11    | 10.63            | 1.54e-06 | Up          |
| Glypican pathway                        | 13    | 7.64             | 3.48e-06 | Up          |
| IL-6 mediated signaling                 | 7     | 34.15            | 3.91e-06 | Up          |
| Adherens junction                       | 6     | 19.96            | 4.29e-05 | Up          |
| Neutrophin signaling                    | 6     | 12.20            | 0.0008   | Up          |
| Wnt signaling pathway                   | 5     | 21.35            | 0.0002   | Up          |
| MAPK signaling pathway                  | 7     | 11.07            | 0.0002   | Up          |
| ErbB signaling pathway                  | 5     | 14.72            | 0.001    | Up          |
| IGF1 pathway                            | 4     | 34.15            | 0.001    | Up          |
| Metabolic pathways                      | 14    | 3.27             | 0.003    | Down        |
| Synthesis of bile acids and bile salts  | 4     | 59.45            | 0.0024   | Down        |
| AR signaling                            | 4     | 8.96             | 0.002    | Down        |
| IFN-gamma pathway                       | 8     | 6.03             | 0.009    | Down        |

\*Direction of regulation refers to the up- or down-regulated gene sets used for pathway analysis and not to the overall direction in pathway regulation.

**Table S7.** Pathway enrichment analysis for LNCaP-1F5 and VCaP cells

Pathway analysis was performed for enriched gene sets for ChIP-seq mapped genes in parental and FoxA1-depleted cells common to LNCaP-1F5 and VCaP cells.

| <b>Pathway</b>                                                                                 | <b>Genes</b> | <b>Enrichment Ratio</b> | <b>P-value</b> |
|------------------------------------------------------------------------------------------------|--------------|-------------------------|----------------|
| <u>New sites common to LNCaP-1F5 and VCaP cells under FoxA1 depletion conditions (siFoxA1)</u> |              |                         |                |
| Insulin signaling pathway                                                                      | 8            | 7.53                    | 6.02e-05       |
| Neurotrophin signaling pathway                                                                 | 5            | 5.12                    | 0.014          |
| Chronic myeloid leukemia                                                                       | 4            | 6.78                    | 0.019          |
| Pathways in cancer                                                                             | 7            | 2.71                    | 0.036          |
| Type II diabetes mellitus                                                                      | 3            | 8.11                    | 0.049          |
| <u>FoxA1-independent in LNCaP-1F5 and VCaP cells</u>                                           |              |                         |                |
| Biosynthesis of unsaturated fatty acids                                                        | 4            | 17.77                   | 0.001          |
| Aldosterone-regulated sodium reabsorption                                                      | 5            | 6.51                    | 0.006          |
| Apoptosis                                                                                      | 5            | 5.62                    | 0.01           |
| Jak-STAT signaling pathway                                                                     | 6            | 3.78                    | 0.01           |

**Table S8.** Gene ontology enrichment analysis for LNCaP-1F5 and VCaP cells

Gene ontology (GO) analysis was performed for enriched gene sets for ChIP-seq mapped genes in parental and FoxA1-depleted cells common to LNCaP-1F5 and VCaP cells.

| <b>GO Term</b>                                                                                 | <b>Genes</b> | <b>Enrichment Ratio</b> | <b>P-value</b> |
|------------------------------------------------------------------------------------------------|--------------|-------------------------|----------------|
| <u>New sites common to LNCaP-1F5 and VCaP cells under FoxA1 depletion conditions (siFoxA1)</u> |              |                         |                |
| GO:0009725~response to hormone stimulus                                                        | 12           | 9.02                    | 4.63e-08       |
| GO:0032870~cellular response to hormone/peptide hormone stimulus                               | 7            | 14.53                   | 1.26e-07       |
| GO:0008286~insulin receptor signaling pathway                                                  | 4            | 29.84                   | 2.99e-04       |
| GO:0007242~intracellular signaling cascade                                                     | 14           | 3.07                    | 3.13e-04       |
| GO:0042127~regulation of cell proliferation                                                    | 10           | 3.50                    | 0.0015         |
| GO:0007167~enzyme linked receptor protein signaling pathway                                    | 6            | 4.84                    | 0.007          |
| GO:0051094~positive regulation of developmental process                                        | 5            | 4.96                    | 0.016          |
| GO:0030334~regulation of cell migration                                                        | 4            | 6.53                    | 0.021          |
| <u>FoxA1-independent in LNCaP-1F5 and VCaP cells</u>                                           |              |                         |                |
| GO:0030521~androgen receptor signaling pathway                                                 | 3            | 21.67                   | 0.008          |
| GO:0030522~intracellular receptor-mediated signaling pathway                                   | 3            | 10.40                   | 0.032          |
| GO:0008610~lipid biosynthetic process                                                          | 5            | 4.02                    | 0.033          |
| GO:0008593~regulation of Notch signaling pathway                                               | 2            | 47.30                   | 0.040          |
| GO:0006508~proteolysis                                                                         | 9            | 2.22                    | 0.042          |
| GO:0006916~anti-apoptosis                                                                      | 4            | 5.05                    | 0.042          |



**Table S9.** List of *cis*-elements enriched in the vicinity of the three ARB categories shown in Figs. 1 and 2. In each case, the ten most enriched *cis*-elements are shown.

## (A) AR-binding sites independent of FoxA1.

| <b>Motif</b> | <b>Enrichment Ratio</b> | <b>p-value</b> |
|--------------|-------------------------|----------------|
| AR           | 19.8956                 | 78.53E-176     |
| TLX1::NFIC   | 4.0920                  | 35.35E-12      |
| ESR2         | 2.8879                  | 3.19E-08       |
| FOXA1        | 2.2878                  | 1.19E-272      |
| TAL1::GATA1  | 2.1914                  | 8.15E-16       |
| GABPA        | 2.0527                  | 3.29E-26       |
| FOXF2        | 2.00                    | 6.45E-52       |
| STAT3        | 1.9964                  | 4.18E-46       |
| FOXA2        | 1.8807                  | 1.459E-208     |
| ELK4         | 1.8534                  | 7.178E-06      |

## (B) AR-binding sites pioneered by FoxA1.

| <b>Motif</b> | <b>Enrichment Ratio</b> | <b>p-value</b> |
|--------------|-------------------------|----------------|
| AR           | 4.0404                  | 5.03E-16       |
| FOXA1::AR*   | 3.8718                  | 1.63E-114      |
| FOXA1        | 3.7707                  | 0.00E00        |
| FOXA2        | 3.7237                  | 0.00E00        |
| FOXF2        | 3.3948                  | 9.57E-124      |
| FOXD1        | 2.2243                  | 0.00E00        |
| FOXQ1        | 2.0888                  | 36.32E-162     |
| FOXI1        | 1.7994                  | 69.35E-224     |
| TLX1::NFIC   | 1.7994                  | 1.656E-02      |
| FOXO3        | 1.4102                  | 40.99E-270     |

## (C) New AR-binding sites in siFoxA1 cells.

| <b>Motif</b> | <b>Enrichment Ratio</b> | <b>p-value</b> |
|--------------|-------------------------|----------------|
| AR           | 13.9930                 | 0.00E00        |
| TLX1::NFIC   | 4.8639                  | 4.709E-76      |
| ESR1         | 4.0552                  | 1.053E-04      |
| CTCF         | 2.7758                  | 1.315E-22      |
| ESR2         | 2.7498                  | 57.25E-58      |
| GABPA        | 2.4615                  | 14.59E-222     |
| ELK4         | 2.1605                  | 26.88E-54      |
| STAT3        | 2.1004                  | 3.21E-314      |
| TCFCP2I1     | 2.0065                  | 7.07E-114      |
| PPARG::RXRA  | 1.9990                  | 2.844E-34      |
| TAL1::GATA1  | 1.9884                  | 17.43E-70      |

\*The unique *cis*-element shown in Figs. 3D and 3G.

**Table S10.** Demographics and clinicopathological variables of the prostate cancer patients.

| Variable                                        | Total Sample (n=350) |                   |
|-------------------------------------------------|----------------------|-------------------|
|                                                 | n                    | Median (range)    |
| Age at diagnosis, years                         | 350                  | 63 (44–83)        |
| Follow-up time, years                           | 350                  | 13.3 (11.33–25.0) |
| Preoperative PSA, µg/l                          | 278                  | 10.1 (0–120)      |
| Tumor area*                                     | 342                  | 15% (0.1–100)     |
| Gleason grade                                   |                      |                   |
| 4                                               | 1 (0.3)              |                   |
| 5                                               | 9 (2.6)              |                   |
| 6                                               | 76 (21.7)            |                   |
| 7                                               | 207 (59.1)           |                   |
| 8                                               | 44 (12.6)            |                   |
| 9                                               | 13 (3.7)             |                   |
| pT                                              |                      |                   |
| 2a                                              | 31 (9.5)             |                   |
| 2b                                              | 2 (0.6)              |                   |
| 2c                                              | 160 (49.1)           |                   |
| 3a                                              | 77 (23.6)            |                   |
| 3b                                              | 55 (16.9)            |                   |
| 3c                                              | 1 (0.3)              |                   |
| NA                                              | 24                   |                   |
| Positive surgical margins                       |                      |                   |
| Yes                                             | 63 (22.1)            |                   |
| No                                              | 222 (77.9)           |                   |
| NA                                              | 65                   |                   |
| Lymph node involvement                          |                      |                   |
| Yes                                             | 10 (2.9)             |                   |
| No                                              | 334 (97.1)           |                   |
| NA                                              | 6                    |                   |
| FoxA1 nuclear stained area                      | 350                  | 95% (0–100)       |
| FoxA1 nuclear staining intensity– Maximum score |                      |                   |
| negative                                        | 1 (0.3)              |                   |
| weak                                            | 23 (6.6)             |                   |
| moderate                                        | 71 (20.3)            |                   |
| strong                                          | 255 (72.9)           |                   |

\*Tumor area is determined as percentage of tumor in all histological sections of each patient; NA = not available.

**Table S11.** Univariate and multivariate Cox proportional hazards regression analysis of tumor characteristics in a series of patients (n=350) with prostate cancer.

| Characteristic              | No. (%)  | Univariate<br>HR (CI 95%) | <i>P</i> | Multivariate<br>HR (CI 95%) | <i>P</i> |
|-----------------------------|----------|---------------------------|----------|-----------------------------|----------|
| FoxA1 ratio positive nuclei |          |                           |          |                             |          |
| ≤90 %                       | 111 (32) | 1                         |          |                             |          |
| > 90 %                      | 239 (68) | 1.80 (0.79–4.14)          | 0.16     |                             |          |
| FoxA1 staining intensity    |          |                           |          |                             |          |
| Neg-Mod                     | 95 (27)  | 1                         |          | 1                           |          |
| Strong                      | 255 (73) | 2.89 (1.02–8.21)          | 0.04     | 1.72 (0.59–5.04)            | 0.32     |
| Gleason grade               |          |                           |          |                             |          |
| 4-7                         | 293 (84) | 1                         |          | 1                           |          |
| 8-9                         | 57 (16)  | 3.04 (1.50–6.14)          | 0.005    | 2.38 (1.07–5.30)            | 0.03     |
| Margins positive            |          |                           |          |                             |          |
| No                          | 222 (78) | 1                         |          |                             |          |
| Yes                         | 63 (22)  | 0.64 (0.14–2.89)          | 0.56     |                             |          |
| pT                          |          |                           |          |                             |          |
| pT2                         | 193 (59) | 1                         |          | 1                           |          |
| pT3                         | 133 (41) | 20.3 (4.79–85.8)          | <0.0001  | 16.0 (3.72–69.3)            | <0.0001  |
| Lymph nodes                 |          |                           |          |                             |          |
| Neg                         | 344 (97) | 1                         |          | 1                           |          |
| Pos                         | 10 (3)   | 4.24 (1.45–12.4)          | 0.008    | 2.88 (0.81–10.2)            | 0.10     |

**Table S12.** Pair-wise associations between FoxA1 expression and tumor characteristics (Pearson's product moment correlation) in a series of patients (n=350) with prostate cancer.

| Characteristic           | FoxA1<br>%<br>positive<br>nuclei | FoxA1<br>staining<br>intensity | Gleason<br>grade | pT      | Nodal<br>status | Margins<br>positive | Preoperative<br>PSA |
|--------------------------|----------------------------------|--------------------------------|------------------|---------|-----------------|---------------------|---------------------|
| FoxA1 % positive nuclei  | 1                                |                                |                  |         |                 |                     |                     |
| FoxA1 staining intensity | 0.67***                          | 1                              |                  |         |                 |                     |                     |
| Gleason grade            | 0.19**                           | 0.20***                        | 1                |         |                 |                     |                     |
| pT                       | 0.15                             | 0.12                           | 0.40***          | 1       |                 |                     |                     |
| Nodal status             | 0.07                             | 0.07                           | 0.10             | 0.18*   | 1               |                     |                     |
| Margins positive         | 0.00                             | 0.00                           | 0.23**           | 0.26**  | 0.10            | 1                   |                     |
| Preoperative PSA         | 0.00                             | -0.03                          | 0.16             | 0.29*** | 0.03            | 0.37***             | 1                   |

\*\*\* p<0.0001

\*\* p<0.001

\* p<0.01

**Table S13.** Nuclear FOXO1 and FOXO3 staining intensity in prostate cancer tissue specimens containing low-moderate or high FoxA1 staining intensity. AR staining intensity was high in all samples\*.

---

| <u>Nuclear FOXO1 staining</u> |                            |                    |  |
|-------------------------------|----------------------------|--------------------|--|
|                               | Low-moderate FoxA1/High AR | High FoxA1/High AR |  |
| Strong                        | 6                          | 4                  |  |
| Moderate                      | 3                          | 12                 |  |
| Weak                          | 1                          | 14                 |  |
| <u>Nuclear FOXO3 staining</u> |                            |                    |  |
|                               | Low-moderate FoxA1/High AR | High FoxA1/High AR |  |
| Strong                        | 7                          | 10                 |  |
| Moderate                      | 3                          | 12                 |  |
| Weak                          | 0                          | 8                  |  |

---

\*Three TMA slides containing 10 low-moderate FoxA1/high AR spots and 30 high FoxA1/high AR spots were evaluated for staining with FOXO1 and FOXO3 antibodies. The distribution of staining intensities between the low-moderate FoxA1 and high FoxA1 samples is significantly different ( $p < 0.05$ ).

**Table S14.** Sequences of the siRNAs used to deplete FoxA1.

| <b>siRNA sequences</b>                                     | <b>Sequences (5'→3')</b>                                                                            |
|------------------------------------------------------------|-----------------------------------------------------------------------------------------------------|
| siFoxA1 (ON-Targetplus SMARTpool sequences from Dharmacon) | 1) GCACUGCAAUACUCGCCUU<br>2) CCUCGGAGCAGCAGCAUAA<br>3) GAACAGCUACUACGCAGAC<br>4) CCUAAACACUCCUAGCUC |
| Non-targeting pool                                         | 1) UGGUUUACAUGUCGACUAA<br>2) UGGUUUACAUGUUGUGUGA<br>3) UGGUUUACAUGUUUUCUGA<br>4) UGGUUUACAUGUUUCCUA |

**Table S15.** ChIP-sequencing aligned read statistics.

| <b>Sample</b>         | <b>Yield (kbases)</b> | <b>% PF clusters</b> | <b>% Align</b> |
|-----------------------|-----------------------|----------------------|----------------|
| AR (rep 1)            | 626712                | 81.8                 | 73.7           |
| AR (rep 2)            | 628314                | 80.08                | 73.9           |
| FoxA1 (rep 1)         | 701234                | 78.36                | 74.89          |
| FoxA1 (rep 2)         | 708246                | 77.97                | 75.19          |
| AR-siFoxA1 (rep 1)    | 758533                | 74.56                | 73.89          |
| AR-siFoxA1 (rep 2)    | 753454                | 74.52                | 74.39          |
| FoxA1-siFoxA1 (rep 1) | 542030                | 74.5                 | 77.02          |
| FoxA1-siFoxA1 (rep 2) | 552898                | 72.84                | 76.38          |
| H3K4me2               | 894045                | 83.01                | 78.57          |
| H3K4me2-siFoxA1       | 847641                | 85.38                | 78.53          |
| DHS                   | 829000                | 84.29                | 63.35          |
| DHS-siFoxA1           | 907000                | 82.53                | 60.85          |
| rIgG                  | 743283                | 80.59                | 75.27          |
| GR                    | 804000                | 82.05                | 76.63          |
| GR-siFoxA1            | 987000                | 77.30                | 76.26          |
| VCaP-AR               | 1392000               | 84.04                | 79.46          |
| VCaP-AR-siFoxA1       | 1436000               | 79.46                | 73.10          |
| VCaP-rIgG             | 1433000               | 80.28                | 75.51          |

**Table S16.** Sequences of the primers used for ChIP assays and qRT-PCR.

| <b>Primer name</b>               | <b>Primer sequence (5'→3')</b> |
|----------------------------------|--------------------------------|
| PSA enhancer+ (Wang et al. 2005) | TGGGACAACCTTGCAAACCTG          |
| PSA enhancer- (Wang et al. 2005) | CCAGAGTAGGTCTGTTTTCAATCCA      |
| <b>FoxA1- Independent</b>        |                                |
| AR5695+                          | CCATCTTTCATTCCCGATTTT          |
| AR5695-                          | ACAGGGCTGTTCCGTCAA             |
| AR3752+                          | TGTCCCATGAGTGACCTCAA           |
| AR3752-                          | ACTGCTCCAGGAAAACATGG           |
| AR2823+                          | TGGATTTGTCCATCTGTCCA           |
| AR2823-                          | GGCAATGACCCAGGATTC             |
| AR3174+                          | ACCAGCGTGCCTTTTATCAC           |
| AR3174-                          | CTCGATTCCTCCAATCCAA            |
| AR5138+                          | AGGGAGGATGTGGTGAGAACT          |
| AR5138-                          | AAGCGATCCGTCTACCAATG           |
| AR5327+                          | CAGCCAGCATTTTGTGAAAGT          |
| AR5327-                          | GGCAGAGAGCCAGAATCAAC           |
| AR5328+                          | CCACAGGGAGAGAGTGGGTA           |
| AR5328-                          | CCATCGGTTTCATAGTGTGCTT         |
| AR4310+                          | TTCCCGCTGAATACACACAC           |
| AR4310-                          | GCATGAACAGAGAGTGAAGCTG         |
| VCaP-I2+                         | AGGGAGGATGTGGTGAGAACT          |
| VCaP-I2-                         | AAGCGATCCGTCTACCAATG           |
| VCaP-I3+                         | CCACAGGGAGAGAGTGGGTA           |
| VCaP-I3-                         | CCATCGGTTTCATAGTGTGCTT         |
| VCaP-I4+                         | GGCTGCTGCAGGATAAAGG            |
| VCaP-I4-                         | ATGGAGTGCAGGTTGGAGAG           |
| VCaP-I5+                         | GCAGCAGCCTGGAGTTTAC            |
| VCaP-I5-                         | AAATGAGAGAGTGGGGAAAGC          |
| VCaP-I6+                         | TCATGCACAGAAGGAAGTGG           |
| VCaP-I6-                         | CGTCCAGTAGCAGCCTTTTC           |
| VCaP-I7+                         | CATCAGGGGTAGAGGGTTCA           |
| VCaP-I7-                         | GGCCAAATCAATGTTTCCAC           |
| VCaP-I8+                         | AAGGCAGGAGATGGGACAG            |
| VCaP-I8-                         | ACCCTGCTGCTGGCTAGTT            |



|                        |                        |
|------------------------|------------------------|
| VCaP-I9+               | ACGTTGGGTGTCCAAAACAT   |
| VCaP-I9-               | AGGATTGTGCCACACCTGAT   |
| <b>FoxA1-Pioneered</b> |                        |
| AR2827+                | GGGAGACAGATTTTCCCTGAG  |
| AR2827-                | CGGGCATACTCTTGTGAA     |
| AR5569+                | TGCCATCAGAAGAATCCACA   |
| AR5569-                | ACCAACATTCTGGGACACGTA  |
| AR5144+                | CACACTATGATGGCCTGTGG   |
| AR5144-                | TGTGTGGCTGTGTTCCAATAA  |
| AR3757+                | TAAAGGAAGGGGGAGAAAGG   |
| AR3757-                | TGGCCCTGAAGATGAATAGG   |
| AR1177+                | TGTTGATGGGATGCTTGTAGTC |
| AR1177-                | GAAAAGCCCTCAGTGTGTCTCT |
| AR2830+                | TTCTCCTCTTGCAGTGTTTTCA |
| AR2830-                | CCCCATCAGAAATGCTCT     |
| AR10+                  | AAATTTGCCAGGCTGGTTC    |
| AR10-                  | GGTGTCCGAAATCCACTGTAA  |
| AR5141+                | TTTCCCGACAGATTTTGTAGAG |
| AR5141-                | GGGTAAACAAATTGGGACACA  |
| VCaP-U1+               | AGTTGCTATGGGGCCAGTT    |
| VCaP-U1-               | TACTGCCAGCACGTCTTCTG   |
| VCaP-U2+               | CCACACAACTTCTGGCTCA    |
| VCaP-U2-               | GTATGCTGCCCACTTGGTTT   |
| VCaP-U3+               | GGACGTGACAGATTCCTCAA   |
| VCaP-U3-               | CCCTTGCTATTGTTTGCTTTTC |
| VCaP-U4+               | CGTATGCCTTCCCACAATG    |
| VCaP-U4-               | TGCCAGAGGTACGTGTGTTC   |
| VCaP-U5+               | GGAGGACATCAGGGATACCA   |
| VCaP-U5-               | GGGAGCGTAAGAACCACCTT   |
| VCaP-U6+               | AACATCCAAAGAAATGCTTCGT |
| VCaP-U6-               | TGTCCTGTGCAAGCAACAAT   |
| VCaP-U7+               | TCCTGACTTCACCCCTGACT   |
| VCaP-U7-               | TATGCAGTGGCAAGGAAACA   |
| VCaP-U8+               | CAGCTCACCTGCACATAGTCA  |
| VCaP-U8-               | AGAAAGCAAGGGAAGAAATGC  |

|                             |                       |
|-----------------------------|-----------------------|
| VCaP-U9+                    | CGGCAAATATTGATTTGAGGA |
| VCaP-U9-                    | TGGCACCTATTCAGCACAGA  |
| <b>New sites in siFoxA1</b> |                       |
| AR11836+                    | CCTGACCTCAGCTCTCCTTTT |
| AR11836-                    | TTCAGGGAGCAGGAAGTTTG  |
| AR2002+                     | ATTCAGACCTGGCATGAACC  |
| AR2002-                     | GAGGGCTCTTCTTGGACAGA  |
| AR8720+                     | CTGGGGCCTGAAACCTTAG   |
| AR8720-                     | GTGGGGACGTCATGTTCTG   |
| AR10310+                    | TGTGTGACCACAGTACCCTGA |
| AR10310-                    | ATCTGCCTGGCAAAGGTCT   |
| AR3233+                     | TGTCTGACAGTGAGGCAAGG  |
| AR3233-                     | GCTTTCCTGTTCTGATCCA   |
| AR15327+                    | ATCTGCCACTCCCCACTTC   |
| AR15327-                    | TAGAGTCTCCCGGGAACAAA  |
| AR10313+                    | GCCCTGTAAAGCACAGTTCAG |
| AR10313-                    | GTTCCAGTGAAGCCACAGT   |
| AR5+                        | GCTAAACGACCAGGTCAAGC  |
| AR5-                        | CTTCATGCCAGAGTGTTCCA  |
| VCaP-N1+                    | AATGCCCAGATGGAAAACAG  |
| VCaP-N1-                    | GCTGTTCCCTAGGGTGCTGAG |
| VCaP-N2+                    | TCGTTCTCTCCCTCCACTA   |
| VCaP-N2-                    | TCTCCTCAGCTCTTTGGTCAG |
| VCaP-N3+                    | GGCATTCCAGCAGAGTGTG   |
| VCaP-N3-                    | TTTGCACCACAGAAAGCAAG  |
| VCaP-N4+                    | GCAGGGAGGAGCATGAAA    |
| VCaP-N4-                    | TGTACTGGCGAGGAGAGAGAG |
| VCaP-N5+                    | GACAGCAAGGGACAAAAGGA  |
| VCaP-N5-                    | CTTCAGCTGTGGTGCAAGAA  |
| VCaP-N6+                    | CTAATTGGTCACAGCCAGCA  |
| VCaP-N6-                    | CTCCGCCATTTTGCTTTTAA  |
| VCaP-N7+                    | CTAGGGTCCTAGCGATGTGG  |
| VCaP-N7-                    | GAATGCAAGACCTGACAGCA  |
| VCaP-N8+                    | TCTTTCCTGCCTTCCATCAC  |
| VCaP-N8-                    | AGTCACTGGCTGTCCTCTCAG |

|                                 |                        |
|---------------------------------|------------------------|
| VCaP-N9+                        | CAGCTGTGAGGACAGAGGGTA  |
| VCaP-N9-                        | GTCGTACGGTTGGGACAGTAG  |
| <b>mRNA qRT-PCR primer name</b> |                        |
| PSA mRNA+ (Wang et al. 2007)    | TGTGTGCTGGACGCTGGA     |
| PSA mRNA- (Wang et al. 2007)    | CACTGCCCCATGACGTGAT    |
| FoxA1 mRNA+                     | GTGGCTCCAGGATGTTAGGA   |
| FoxA1 mRNA-                     | GAGTAGGCCTCCTGCGTGT    |
| NFKBIA mRNA+                    | GGGACTCGTTCCTGCACTT    |
| NFKBIA mRNA-                    | GTCTGCTGCAGGTTGTTCTG   |
| SPDEF mRNA+                     | AAGTGCTCAAGGACATCGAGA  |
| SPDEF mRNA-                     | AGGAGCCACTTCTGCACATT   |
| LPAR3 mRNA+                     | CTCATGGCCTTCCTCATCAT   |
| LPAR3 mRNA-                     | TACCACAAACGCCCTAAGA    |
| LRIG1 mRNA+                     | CCGAACCTACAGGAAGTGTACC |
| LRIG1 mRNA-                     | TGCGAATCTTGTTGTGCTG    |
| EXTL2 mRNA+                     | CCTGAACTGGAAACCAATGC   |
| EXTL2 mRNA-                     | TCAGGAAATTGCTGCCAAA    |
| AFF3 mRNA+                      | GATGCAGAGCCAGAGAGTCC   |
| AFF3 mRNA-                      | GCCTGCTGTTTCATTCTCCTC  |
| ETS2 mRNA+                      | GGATTCCATTTCTCATGACTCC |
| ETS2 mRNA-                      | CAGGGGTTCTTTGGAATGC    |
| EDN2 mRNA+                      | TGGGTGAACACTCCTGAACA   |
| EDN2 mRNA-                      | AGGCAGAAGGTGGCACAG     |
| FOXO1 mRNA+                     | CGGGCTGGAAGAATTCAA     |
| FOXO1 mRNA-                     | GTTGTTGTCCATGGATGCAG   |
| CITED1 mRNA+                    | CTCACCTGCGAAGGAGGAT    |
| CITED1 mRNA-                    | TGGTTCCATTTGAGGCTACC   |

## **Extended Experimental Procedures**

### **Chromatin Immunoprecipitation (ChIP)**

Five million LNCaP-1F5 cells were cultured on 150-mm dishes in RPMI-1640 medium containing 10% fetal bovine serum (FBS), 2 mM L-glutamine, and 10 mM HEPES supplemented with antibiotics (penicillin and streptomycin) for 4 days and then exposed to 100 nM DHT (or 100 nM dexamethasone) for 2 h. Cells were fixed in 1% formaldehyde (Merck KGaA, Darmstadt, Germany) for 10 min at room temperature and washed twice with ice-cold PBS. Cells were scraped in lysis buffer (5 mM PIPES, pH 8.0, 85 mM KCl, and 0.5% NP-40) containing 2 x protease inhibitors (Roche Inc., Mannheim, Germany).

Antibodies specific for the protein of interest were coupled to Dynal protein-G magnetic beads (Invitrogen) according to the manufacturer's instructions. For each immunoprecipitation (IP), 100  $\mu$ l of sonicated chromatin was diluted 1:10 with 900  $\mu$ l of RIPA buffer containing PIC and 10% was stored as input fraction. To the remaining, 100  $\mu$ l of antibody-coupled magnetic beads were added and incubated on a rotator overnight at 4°C. After incubation, beads were washed 5 times with LiCl wash buffer (100 mM Tris-HCl, pH 7.5, 500 mM LiCl, 1% NP-40, and 1% sodium deoxycholate) and followed by two washes with 10 mM Tris-HCl (pH 8.0) containing 1 mM EDTA. Chromatin-antibody samples were eluted from beads by incubating for 1 h at 65°C in IP elution buffer (1% SDS, 0.1 M NaHCO<sub>3</sub>), followed by overnight incubation at 65°C to reverse cross-linking. DNA was purified using QIAquick PCR purification kit (Qiagen Inc., California, USA) and eluted in 100  $\mu$ l of elution buffer.

### **ChIP-sequencing (ChIP-seq)**

ChIP experiments were carried out using the following antibodies: AR (Kang et al. 2004), FoxA1 (ab23738, Abcam), H3K4me2 (07-030, Millipore), CTCF (ab70303, Abcam), GR (Widen et al., 2000), normal rabbit IgG (sc-2027, Santa Cruz), and normal mouse IgG (sc-2025, Santa Cruz). Immunoprecipitated samples together with input samples were processed for library preparation according to Illumina's instructions. In brief, DNA samples were blunt-ended and ligated to sequencing adapters. Adapter-ligated DNA fragments (size range 150–300 bp) were excised from agarose gel and purified with Qiagen gel extraction kit. Isolated DNA was amplified by PCR (15 cycles), purified, and DNA library was sequenced on Illumina Genome Analyzer II.

The ChIP-seq reads were filtered using the default Illumina chastity filter during the base-calling process and used ELAND (Illumina) to align 30-bp reads to human genome (hg19), allowing up to two mismatches per read. All ChIP-seq experiments were performed in biological duplicates, and only peaks present in both samples were used for downstream analysis.

### **DNaseI-hypersensitivity site mapping by sequencing (DHS-seq)**

The DNaseI-hypersensitivity assay and deep sequencing was performed as described by Song and Crawford (2010). In brief,  $30 \times 10^6$  cells were centrifuged at 900 rpm for 5 min and cells pellets washed twice with ice cold PBS. Cells were lysed with RSB buffer (10 mM Tris-HCl, pH 7.4, 10 mM NaCl, and 3 mM MgCl<sub>2</sub>) with 0.1% NP-40 and nuclei were collected by centrifugation at 500 rpm for 10 min. Intact nuclei were treated with different concentrations (0–12 U) of DNaseI (Roche) for 15 min at 37°C, and reactions were stopped with 0.1 M EDTA. DNaseI-digested high-molecular-weight DNA was embedded in 1.0% InCert (Lonza) low-melt agarose gel in 50 mM EDTA. To remove protein, DNA plugs were washed twice with LIDS buffer (1% lauryl sulfate, 10 mM Tris-HCl, and 100 mM

EDTA) at room temperature, then incubated overnight at 37°C and subsequently washed five times with 50 mM EDTA, 1 h each, by shaking at 60 rpm at room temperature. The DNaseI-digested plugs were run through pulsed field gel electrophoresis system to identify optimal DNaseI digestion. Optimal concentrations of DNaseI generated a smear of high-molecular-weight fragments (>100 kb) when analyzed by pulsed field gel electrophoresis. DNaseI-digested ends were blunt ended in gel with T4 DNA polymerase, melted at 65°C, and purified by phenol extraction and ethanol precipitation followed by library construction for deep sequencing.

The annealed biotinylated linkers containing an *MmeI* restriction site (TCCGAC) at the 3' end were attached to the blunt-ended DNaseI-digested ends followed by digestion with *MmeI*. *MmeI* cuts 20 bp into the sequence adjacent to the DNaseI hypersensitive site, leaving a 2-bp overhang. After purification of DNaseI-digested ends on streptavidin beads, a second set of phosphorylated annealed linkers containing a two-base degenerate overhang was ligated to the dephosphorylated *MmeI* ends. Inserts, along with the linkers were amplified by PCR, and the inserts were purified by PAGE to minimize contamination by adaptors. The insert + linker band was cut and purified by phenol extraction and ethanol precipitation. The purified DNA was sequenced at the BMGen core facility with custom sequencing primers. The linker and sequencing primer sequences are listed in the original publication by Song and Crawford, Cold Spring Harbor Protocols, 2010.

The sequencing reads for DHS-seq were filtered using the default Illumina chastity filter during the base-calling process and used ELAND (Illumina) to align 20-bp reads to human genome (hg19), allowing up to two mismatches per read. The clustering of sequence tags and the DHS peaks were analyzed using F-seq algorithm (Boyle et al., 2008b). F-seq uses kernel density estimation that provides both discrete and continuous probability landscape across the whole genome. These kernel density estimation based probabilities are

computed at each base and are directly proportional to the probability of seeing a sequence read at that location.

### **Bioinformatics Analyses**

Pre-defined motifs of transcription factors were obtained from JASPAR (Portales-Casamar et al. 2010). Over-representation of a motif in ChIP-seq binding sites was calculated against randomly selected regions from the same chromosomes and of the same length as the actual binding sites. The significance of the over- or under-representation was addressed by comparing the binding site frequencies between the groups using  $\chi^2$ -test (Wang *et al*, 2007). *De novo* motif analysis was carried out using MEME (Bailey and Elkan, 1994; Bailey, 2002). The details of all the analyses are provided in the Supplementary information.

### **Evaluation of FoxA1 and AR staining intensity in tissues specimens**

The slides were scanned with an automated whole-slide scanner (Mirax Scan, Zeiss, Göttingen, Germany), using a 20 x objective and a DFW-X710 camera (Sony, Tokyo, Japan). The pixel resolution was 0.26  $\mu\text{m}$  per pixel. The virtual slides were compressed to a wavelet file format (Enhanced Compressed Wavelet, ECW, ER Mapper, Erdas Inc, Atlanta, Georgia) with a compression ratio of 1:5. Staining intensity was evaluated using virtual microscopy software (WebMicroscope, HUCH Clin Res Institute Ltd, Helsinki) without prior knowledge of the Gleason grades. Nuclear staining intensity was scored as being negative, weak, moderate or strong. Proportion of positive nuclei was estimated in semiquantitative manner in five percent-unit intervals. In the survival analysis, a cut-off value of 90% of the maximum score was considered as threshold for nuclear positivity. Automated immunohistochemistry scoring was performed as previously described (Konsti

*et al*, 2011). The separation of different color channels was achieved by a built-in vector for Fast Red in the color deconvolution plugin.

### **Additional references**

Bailey TL (2002) Discovering novel sequence motifs with MEME. *Curr Protoc Bioinformatics*. Chapter 2, Unit 2 4

Bailey TL, Elkan C (1994) Fitting a mixture model by expectation maximization to discover motifs in biopolymers. *Proceedings of the Second International Conference on Intelligent Systems for Molecular Biology*, pp. 28–36

Boyle AP, Guinney J, Crawford GE, Furey TS (2008) F-Seq: a feature density estimator for high-throughput sequence tags. *Bioinformatics* **24**: 2537–2538

Kilpinen S, Autio R, Ojala K, Iljin K, Bucher E, Sara H, Pisto T, Saarela M, Skotheim RI, Björkman M, Mpindi JP, Haapa-Paananen S, Vainio P, Edgren H, Wolf M, Astola J, Nees M, Hautaniemi S, Kallioniemi O (2008) Systematic bioinformatic analysis of expression levels of 17,330 human genes across 9,783 samples from 175 types of healthy and pathological tissues. *Genome Biol* **9**: R139

Konsti J, Lundin M, Joensuu H, Lehtimäki T, Sihto H, Holli K, Turpeenniemi-Hujanen T, Kataja V, Sailas L, Isola J, Lundin J (2011) Development and evaluation of a virtual microscopy application for automated assessment of Ki-67 expression in breast cancer. *BMC Clin Pathol* **11**: 3



Portales-Casamar E, Thongjuea S, Kwon AT, Arenillas D, Zhao X, Valen E, Yusuf D, Lenhard B, Wasserman WW, Sandelin A (2010) JASPAR 2010: the greatly expanded open-access database of transcription factor binding profiles. *Nucl Acids Res* **38**: D105–110

Figure S1

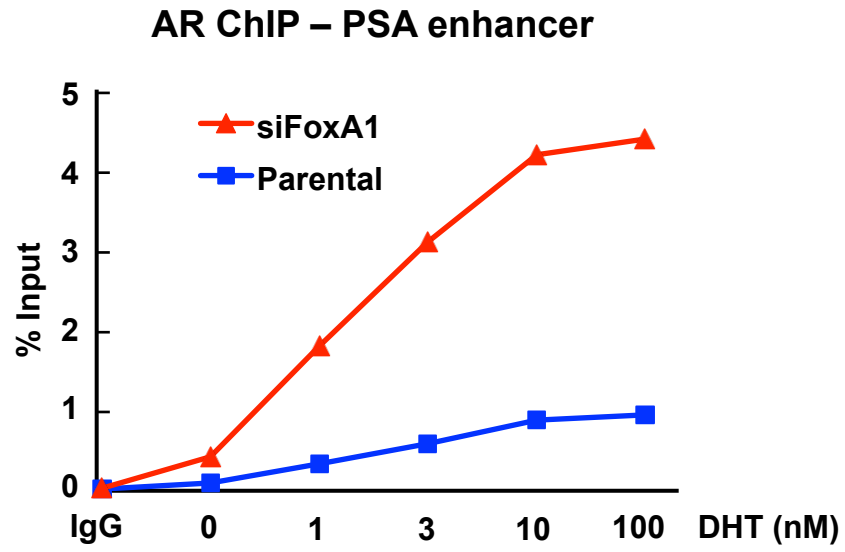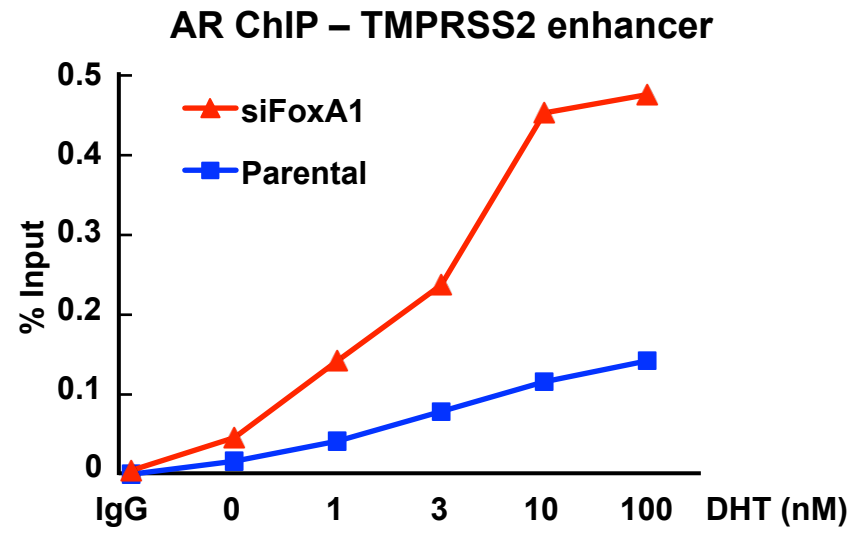

Figure S2

A

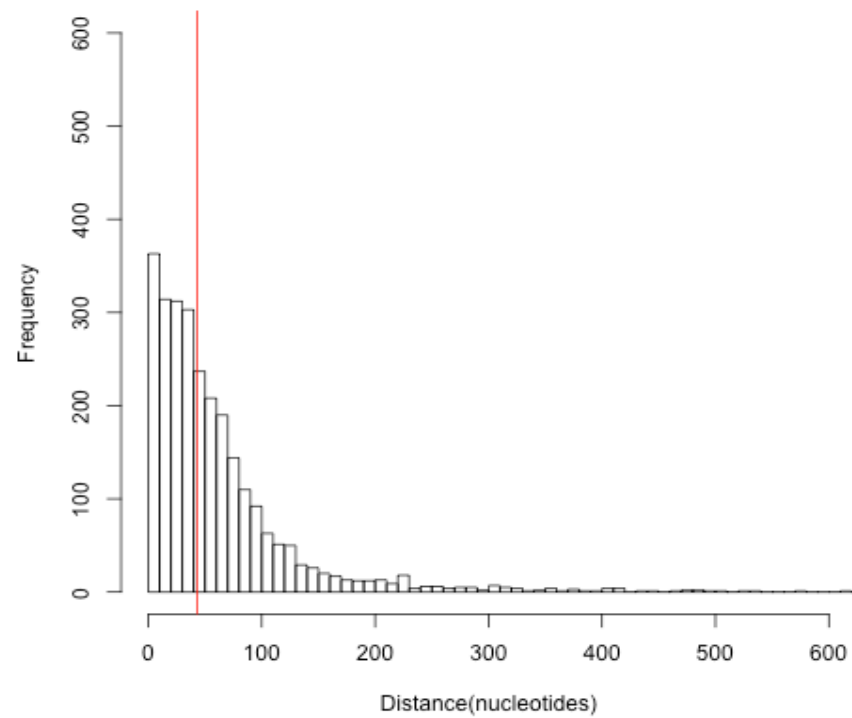

B

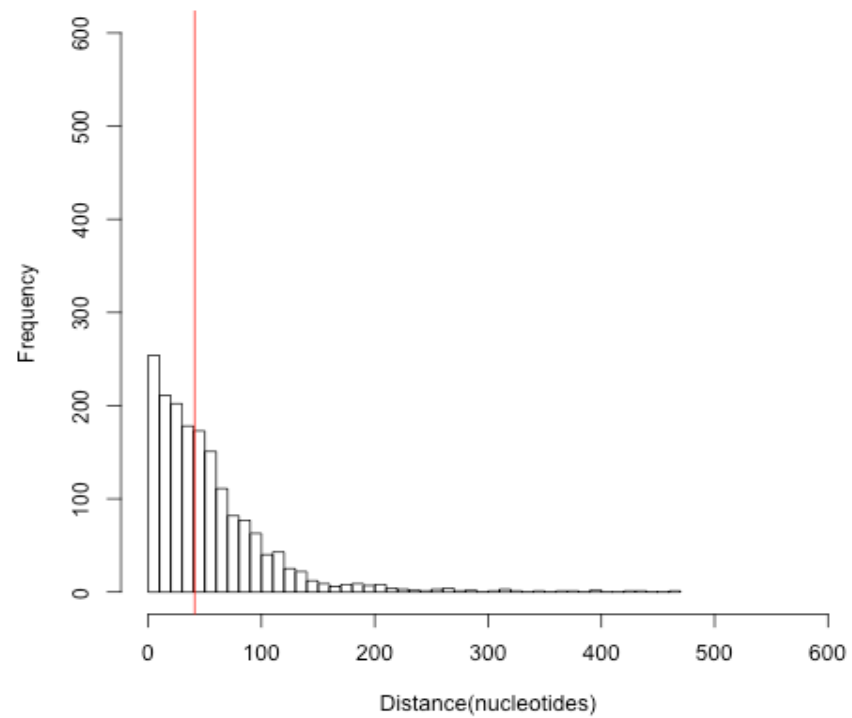

Figure S3

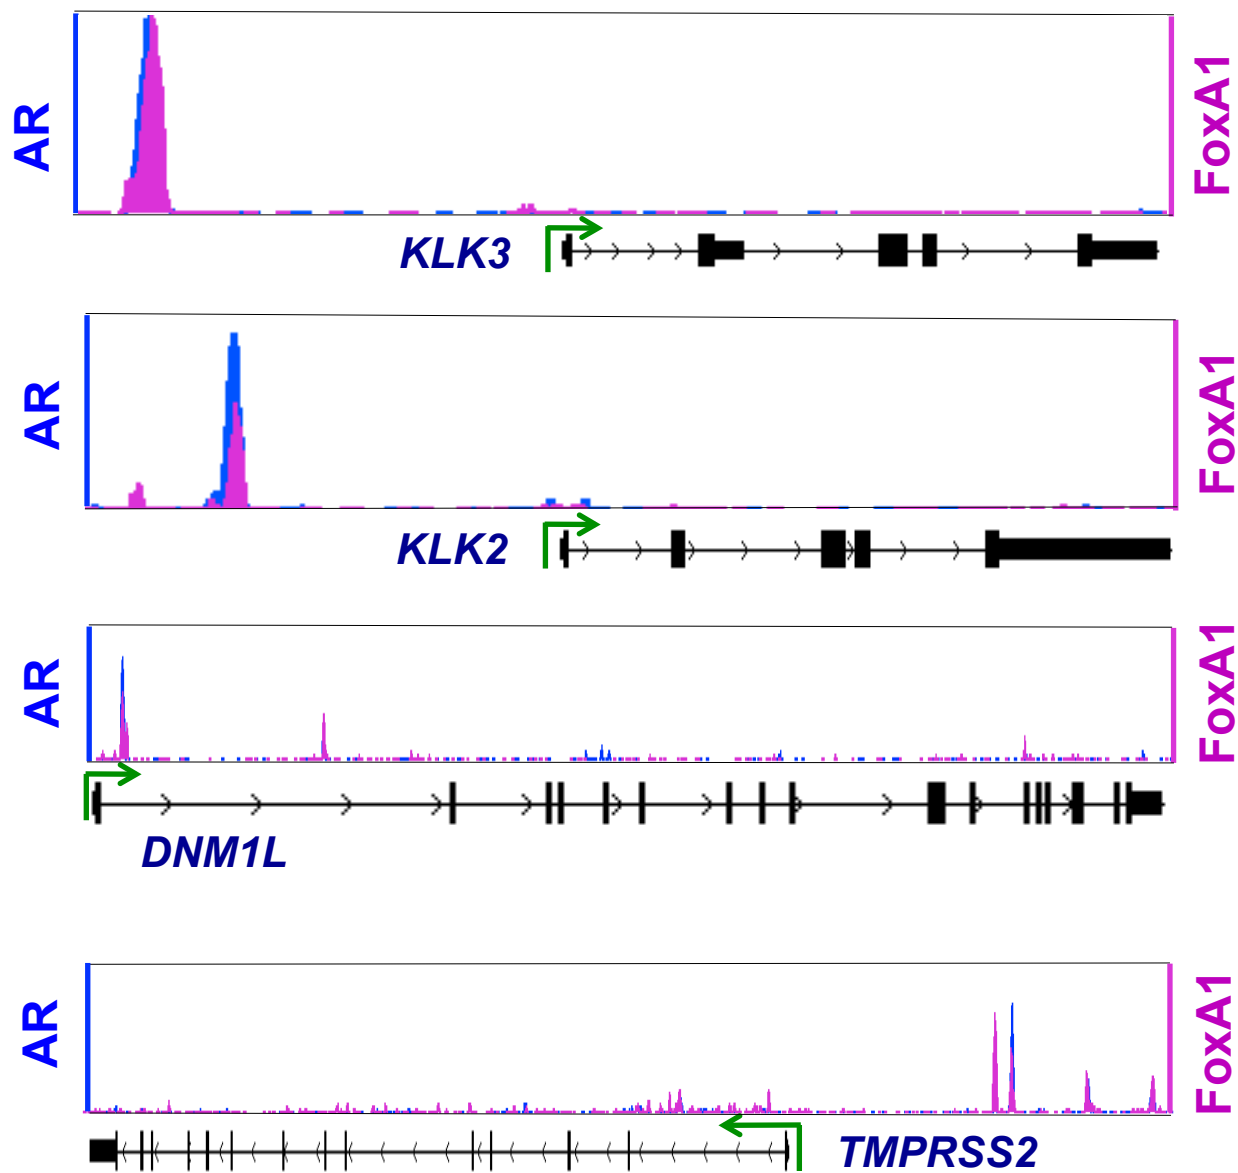

Figure S4

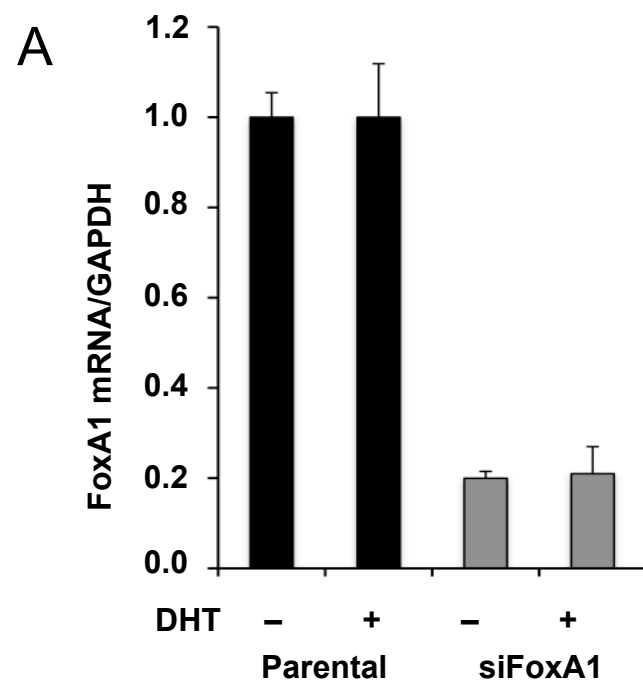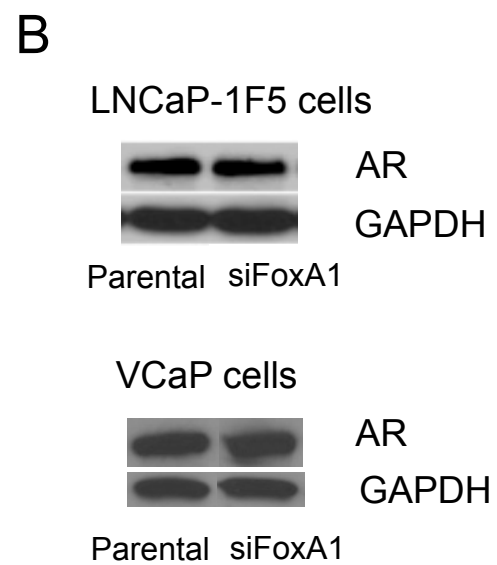

Figure S5

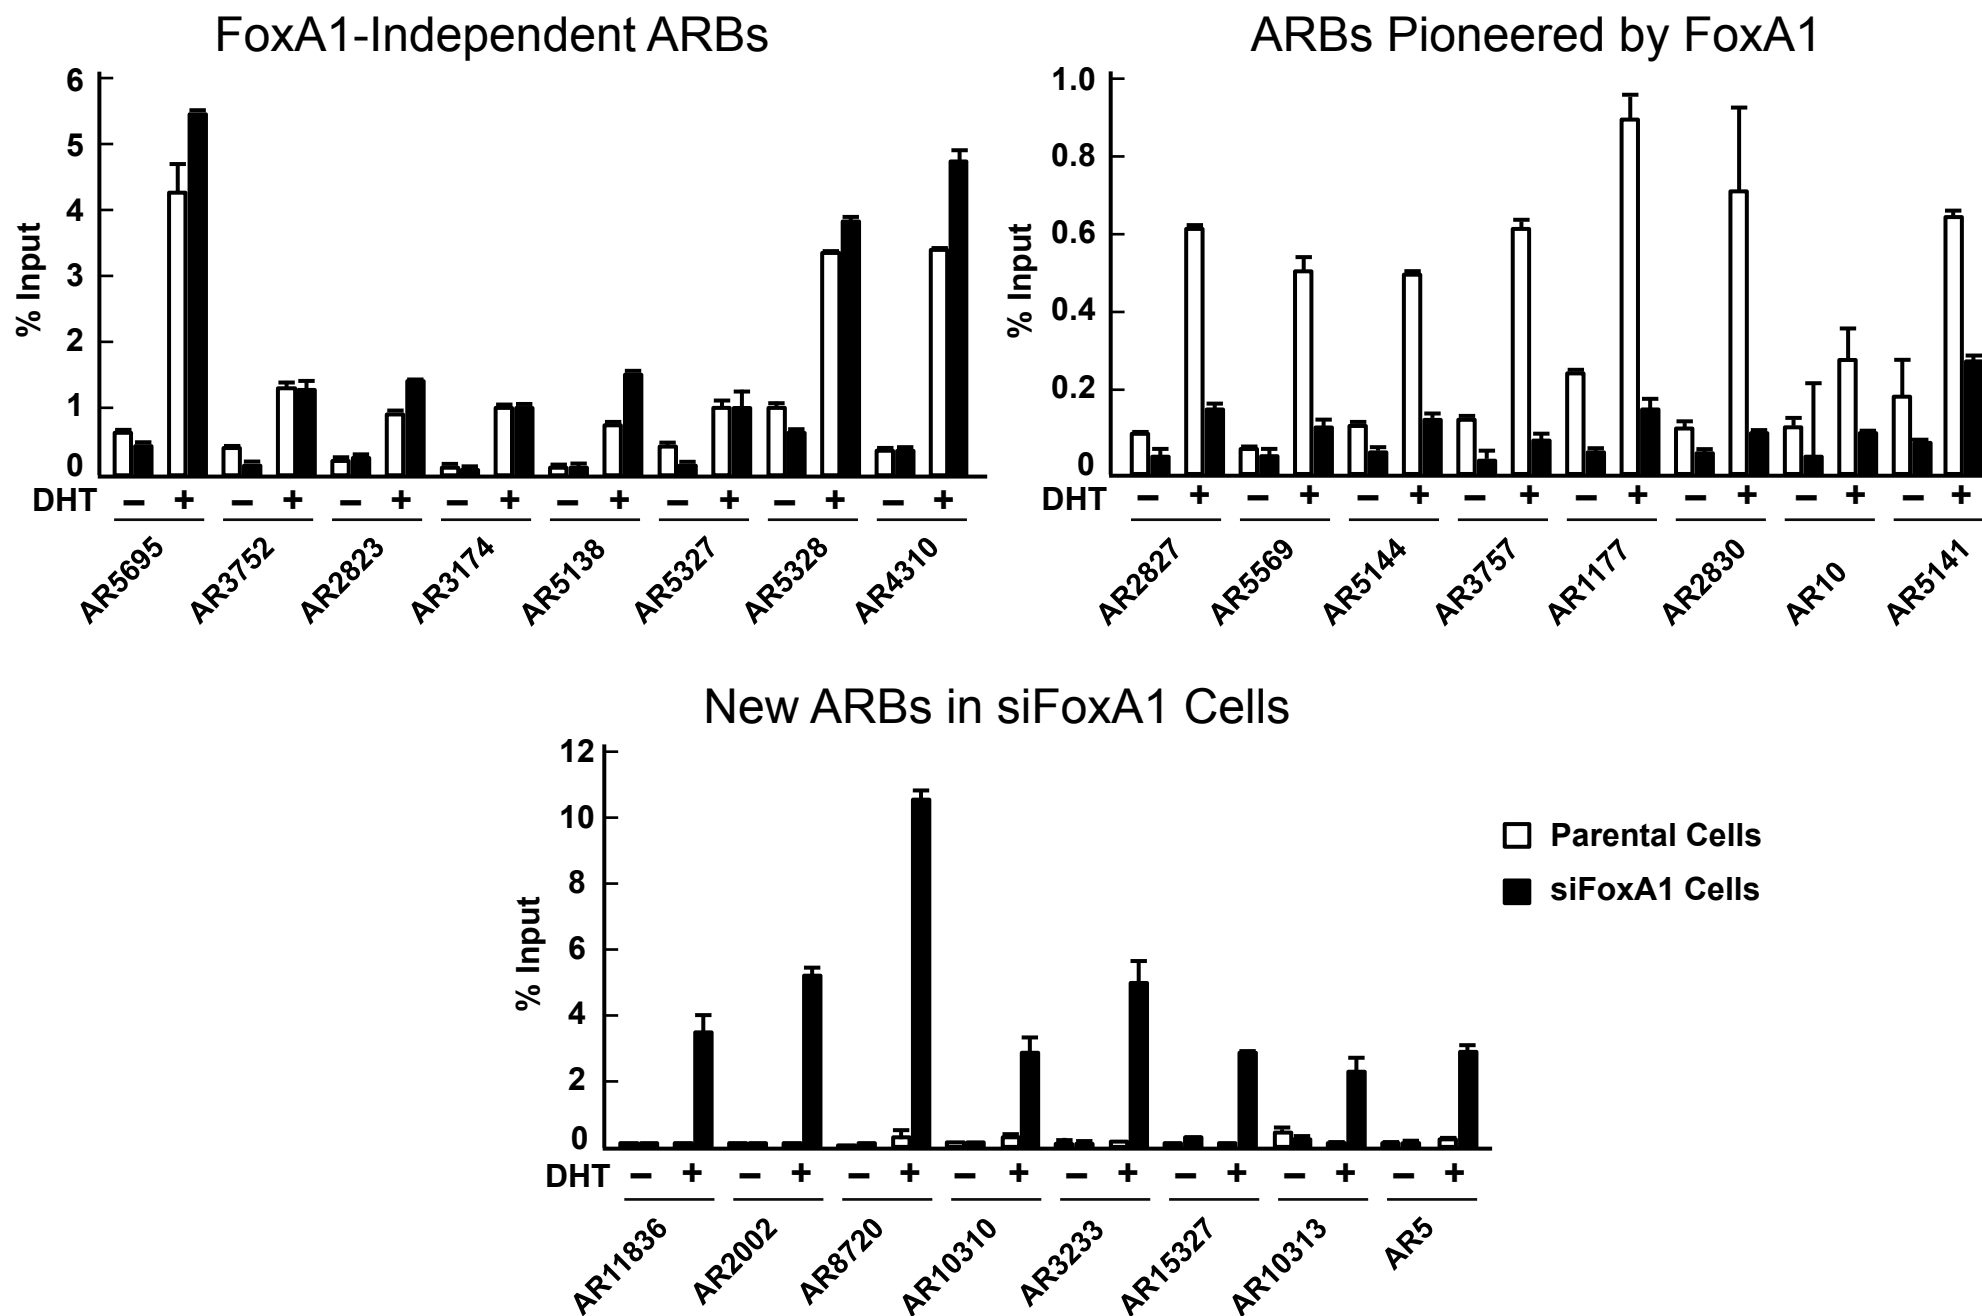

Figure S6

### FoxA1-Independent ARBs in VCaP Cells

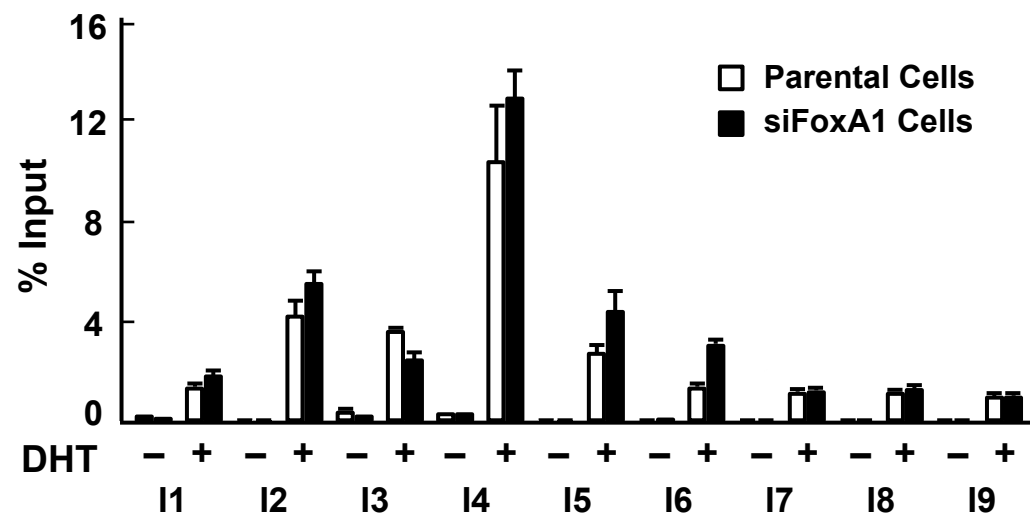

### ARBs Pioneered by FoxA1 in VCaP Cells

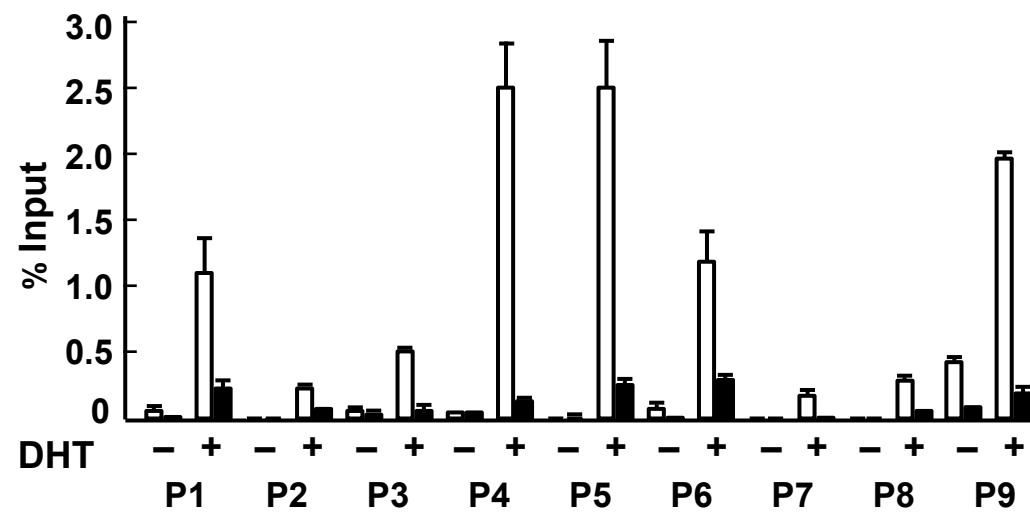

Figure S7A

### FoxA1-independent Genes

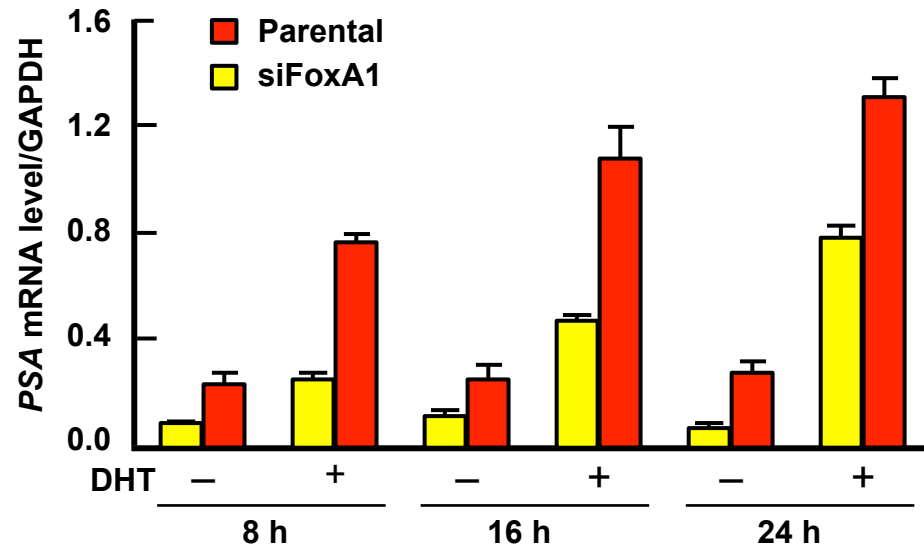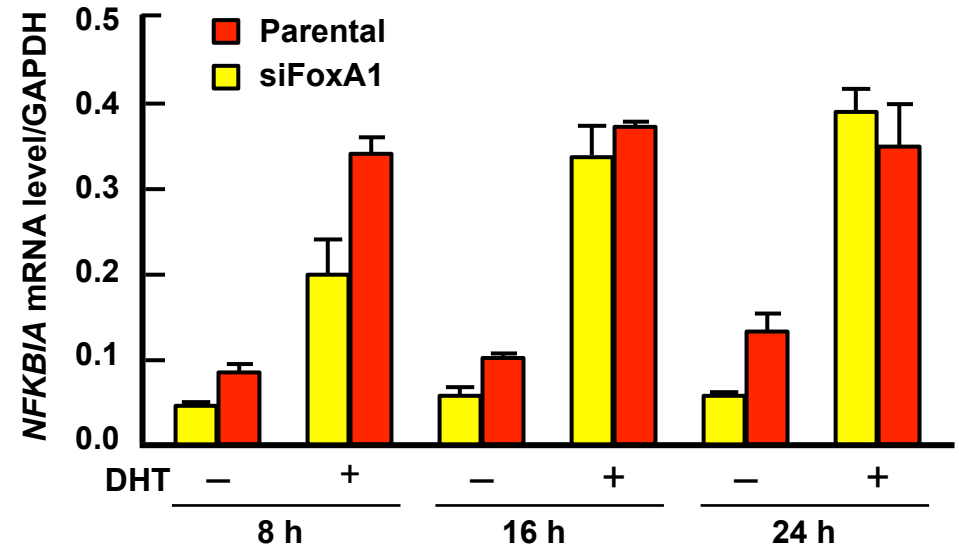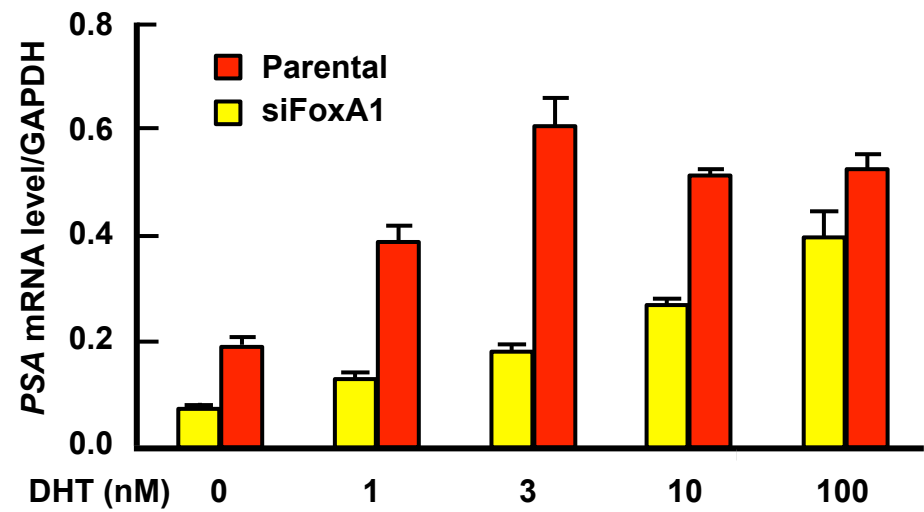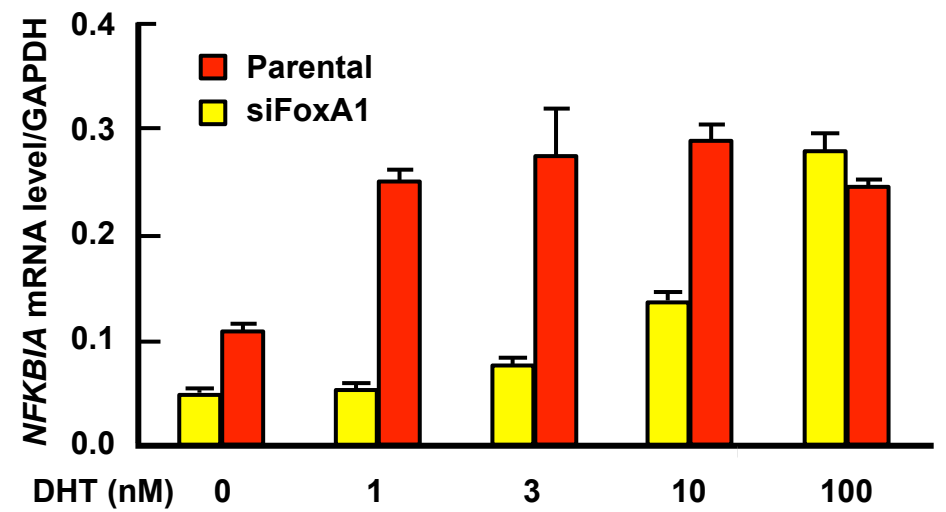



Figure S7B

### FoxA1-pioneered Genes

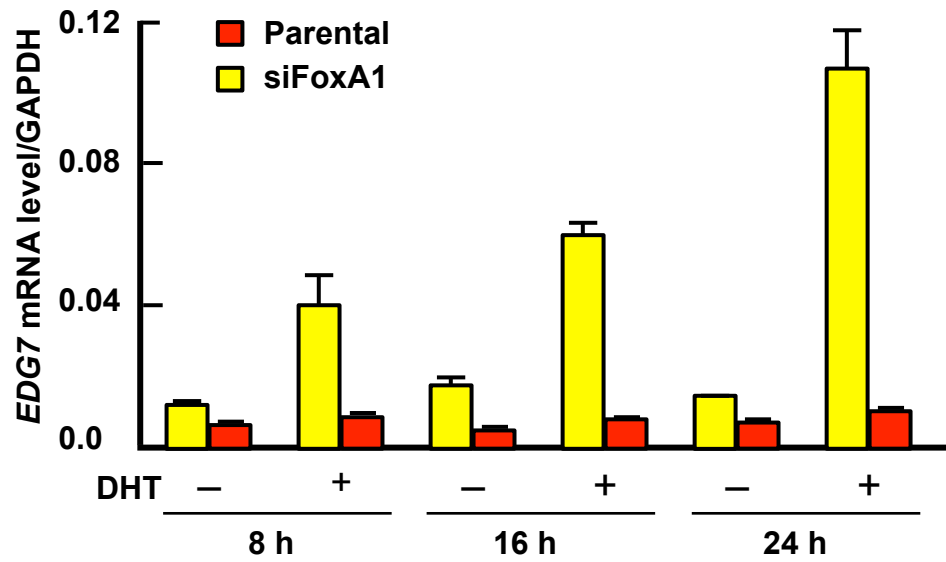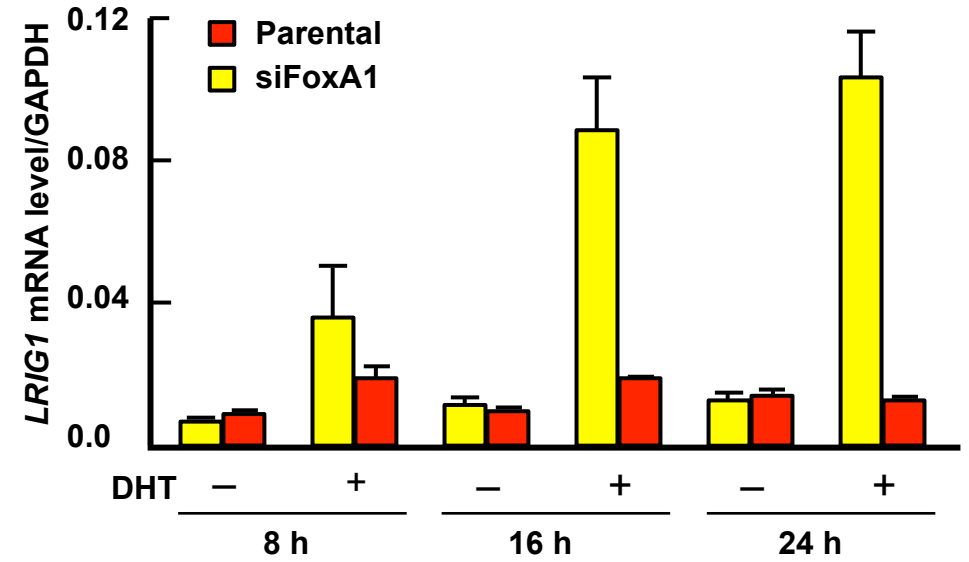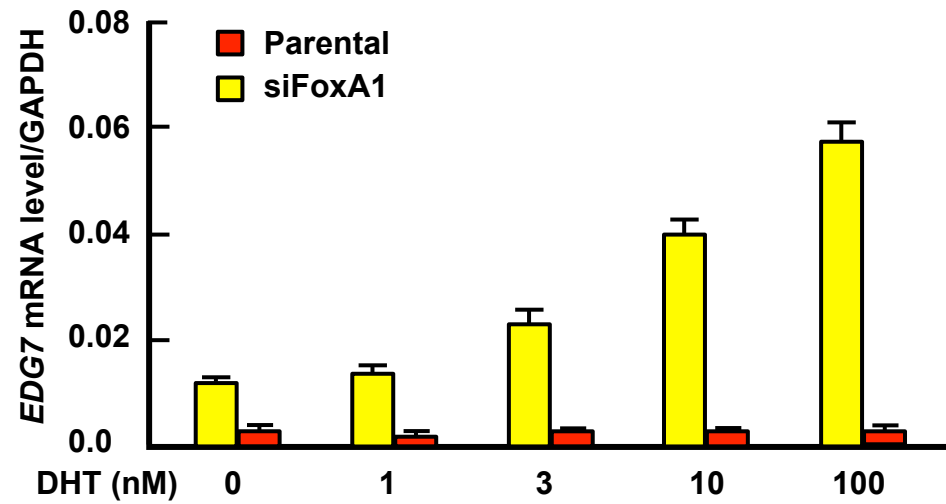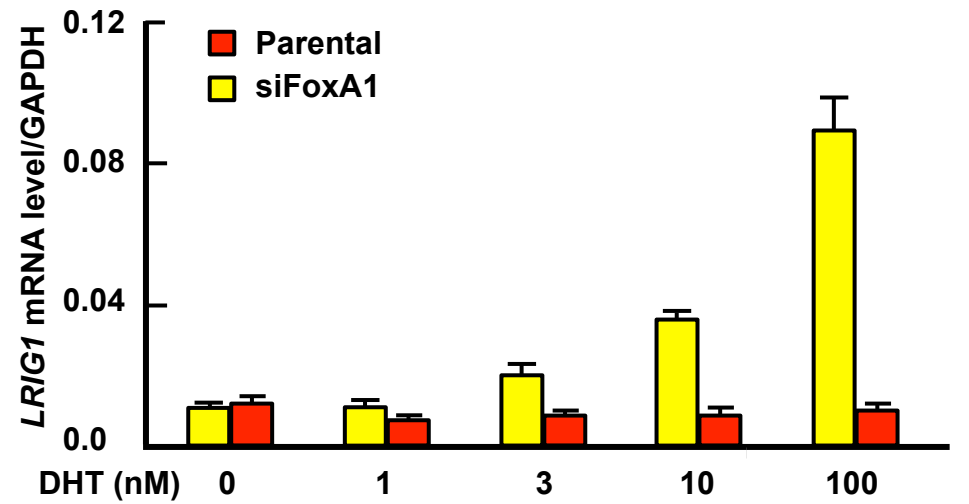

Figure S7C

### New Genes in siFoxA1 Cells

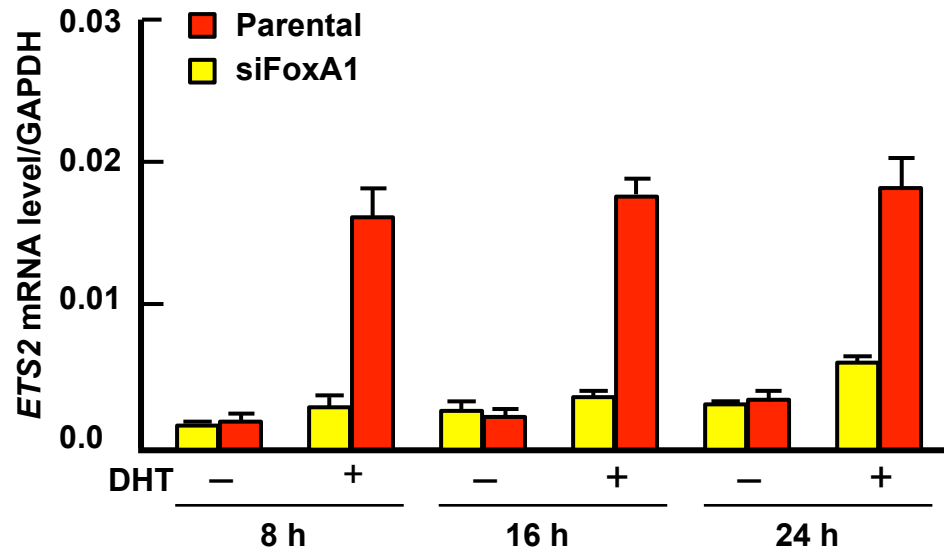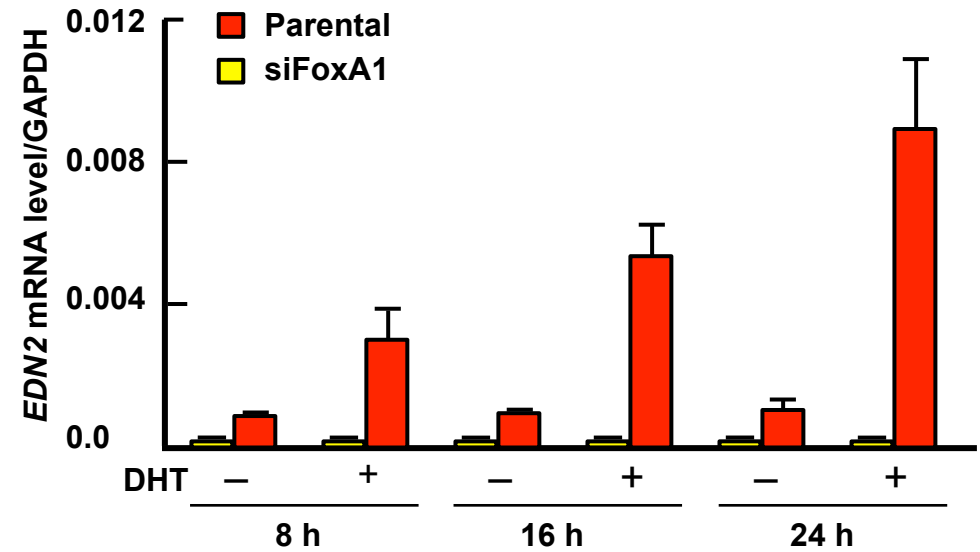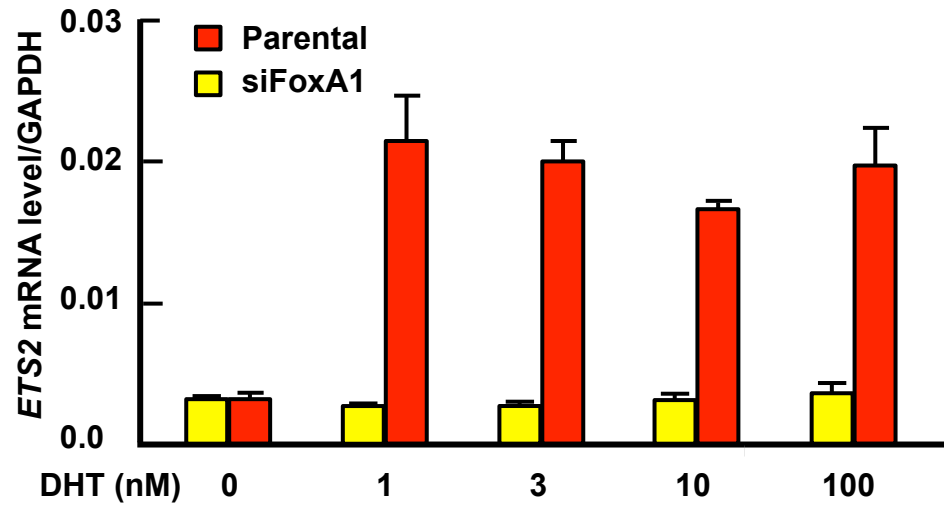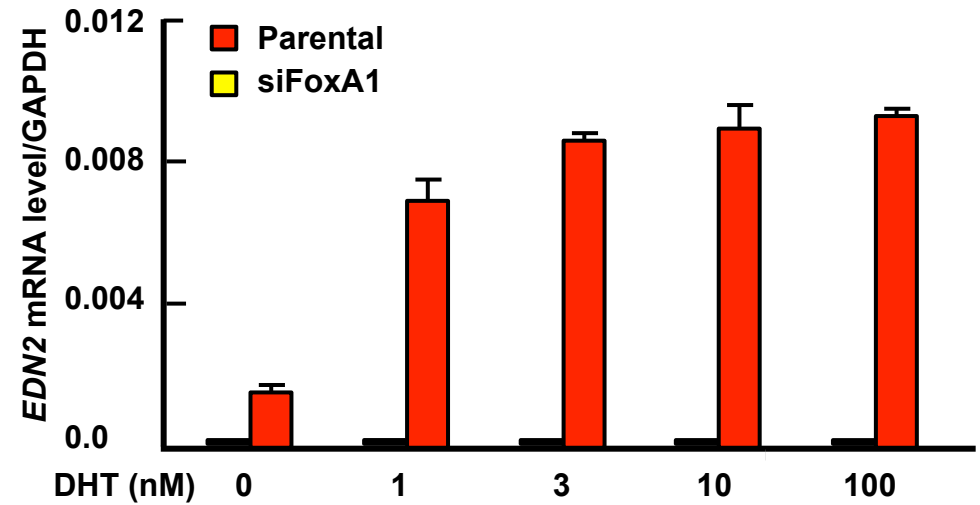

Figure S8

A

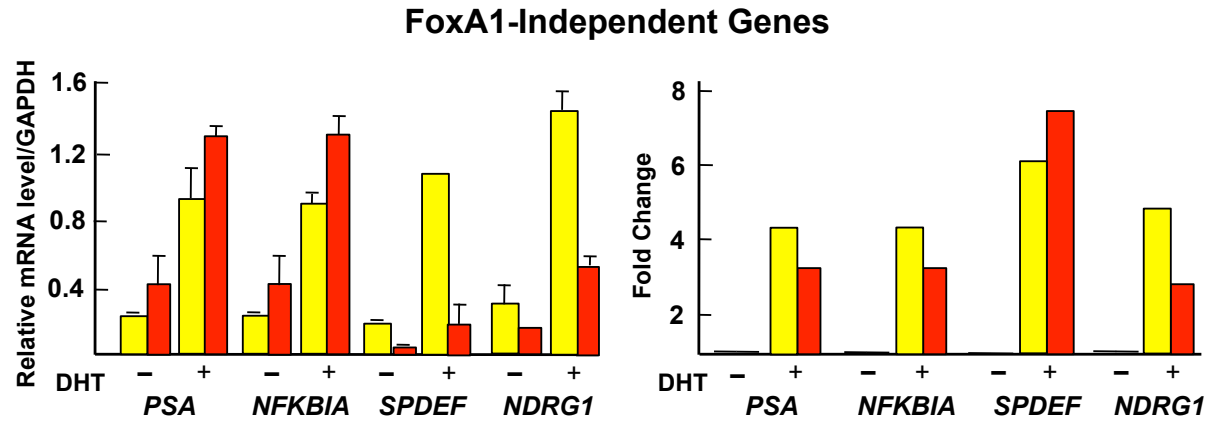

B

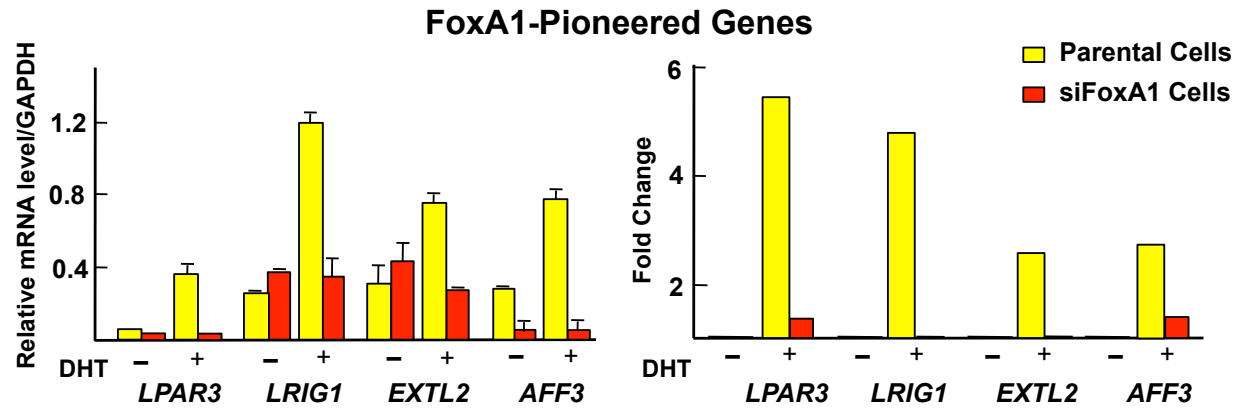

C

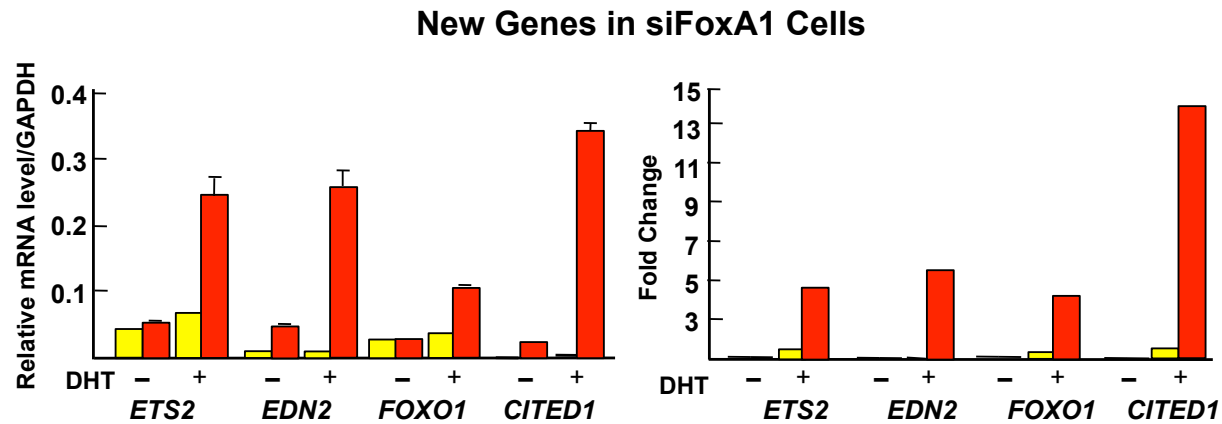

Figure S9

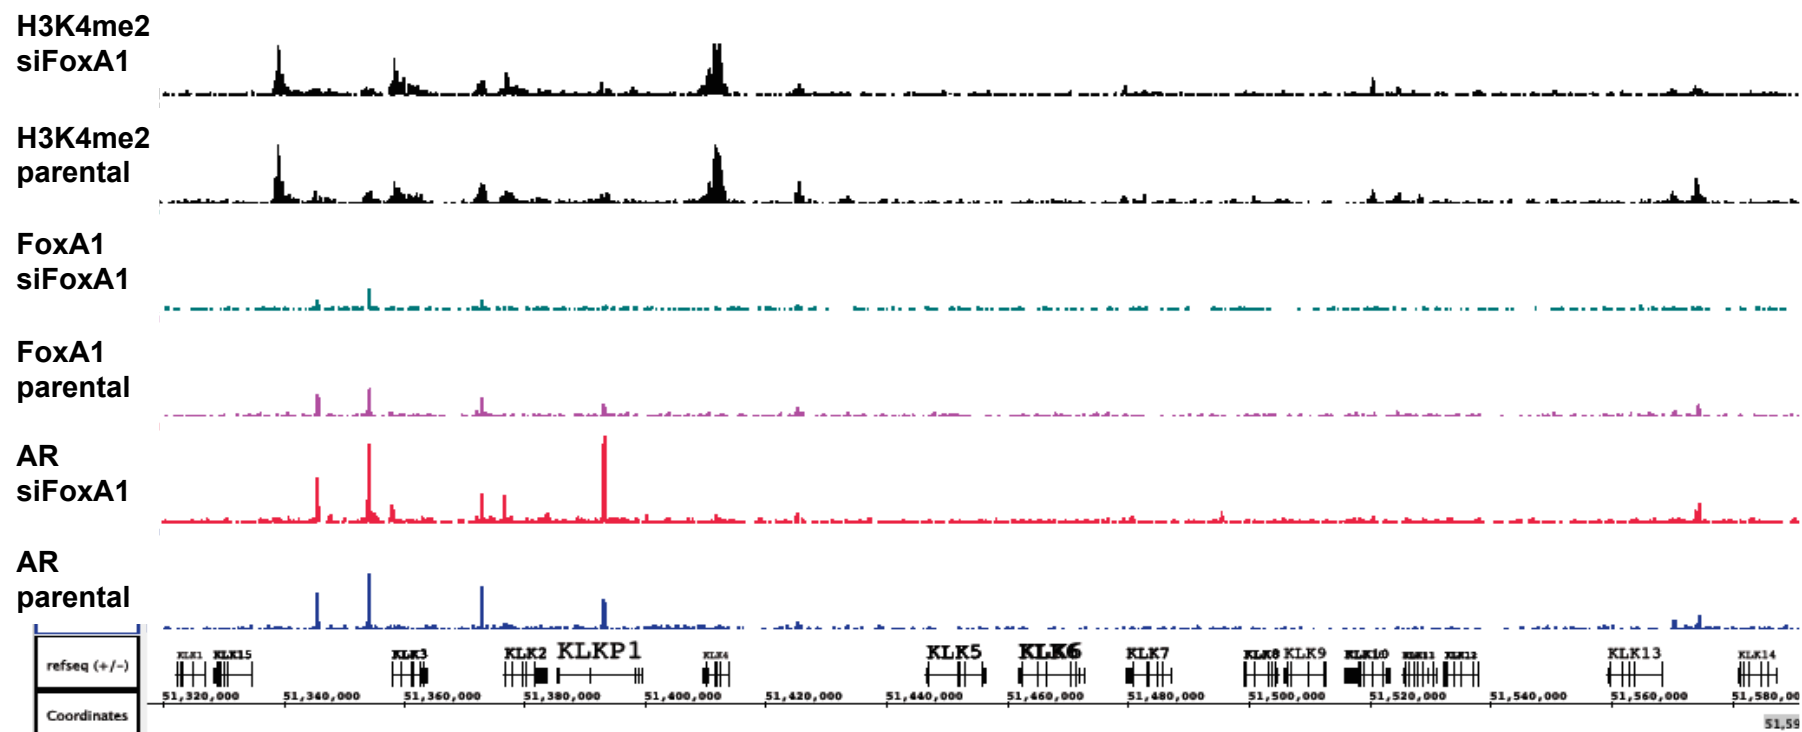

Figure S10

A

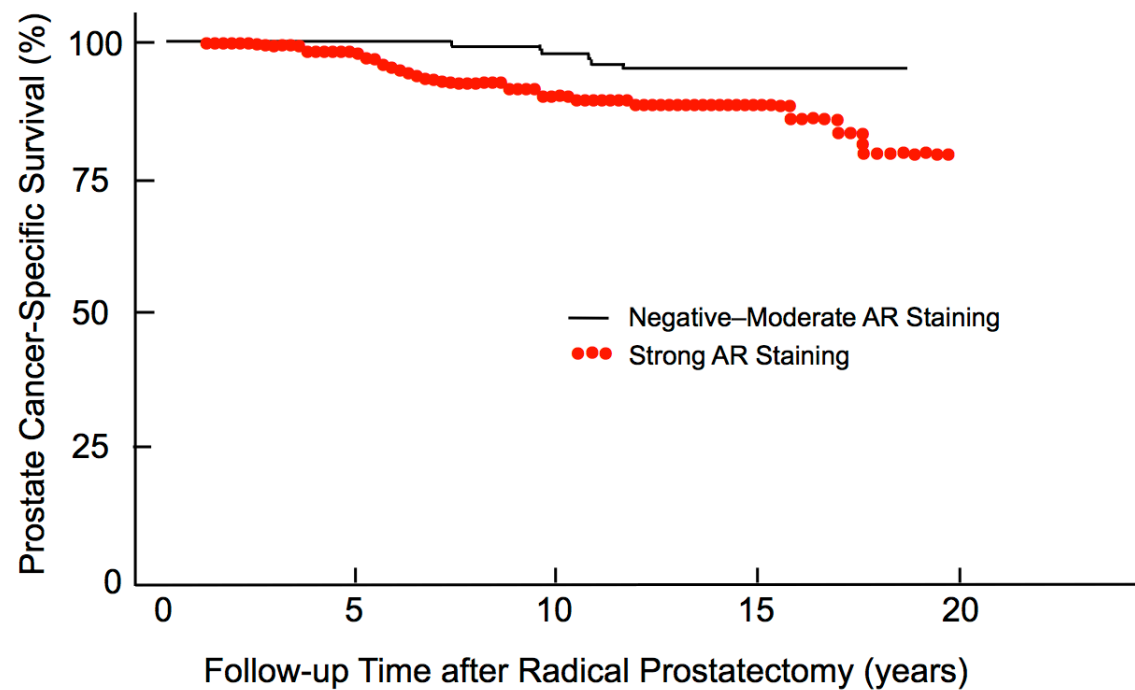

B

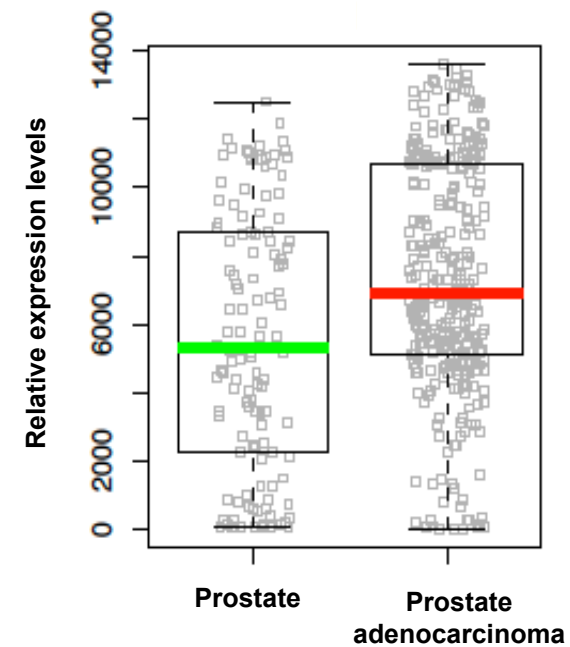

Supplement: emboj2011328s1.pdf [file emboj2011328s1.pdf]
